# Supplementary material for: Huge suppression of charge recombination in P3HT–ZnO organic–inorganic hybrid solar cells by locating dyes at the ZnO/P3HT interfaces
Source: Royal Society of Chemistry journal article supplement (doi:10.1039/c3cp52093e), 2013-01-01
Supplement: c3cp52093e.pdf [file c3cp52093e.pdf]

## Supplemental Material

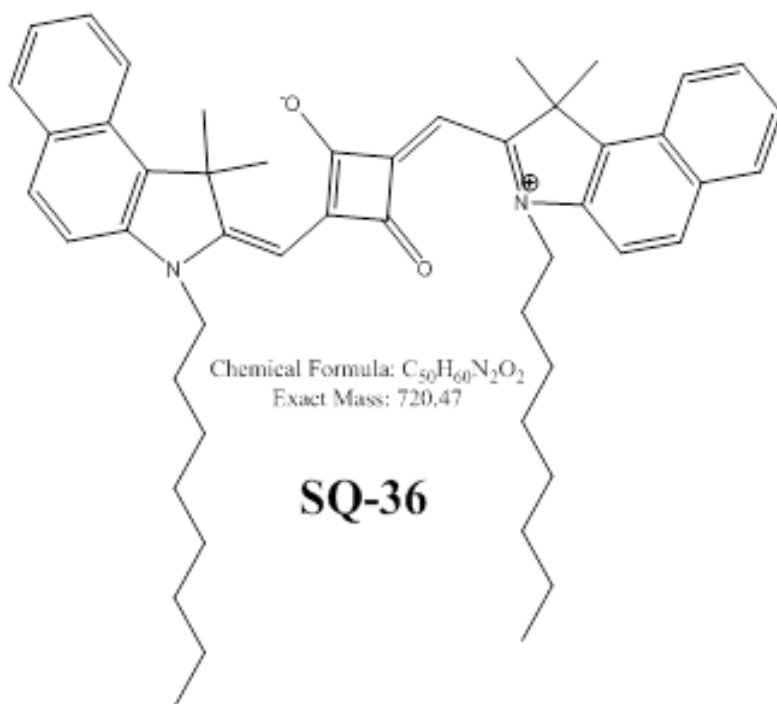

Figure S1. Molecular structure of SQ36 dye.

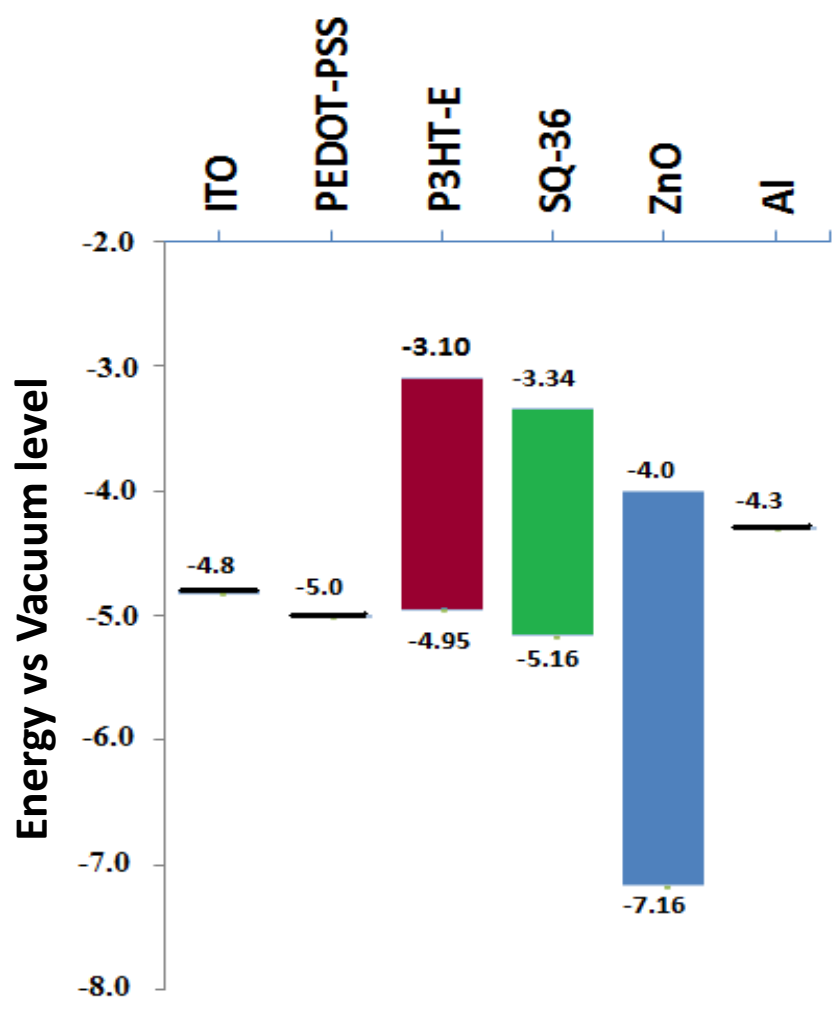

Figure S2. Energetics of P3HT-E, SQ36 and ZnO.

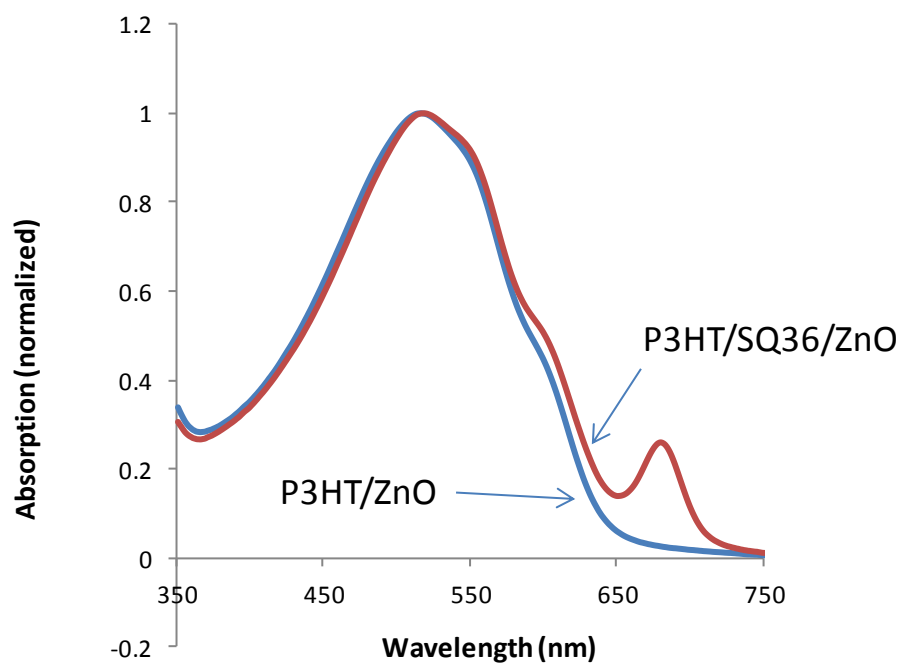

Figure S3. Optical absorption spectra of thin films of P3HT/ZnO and P3HT/SQ36/ZnO.

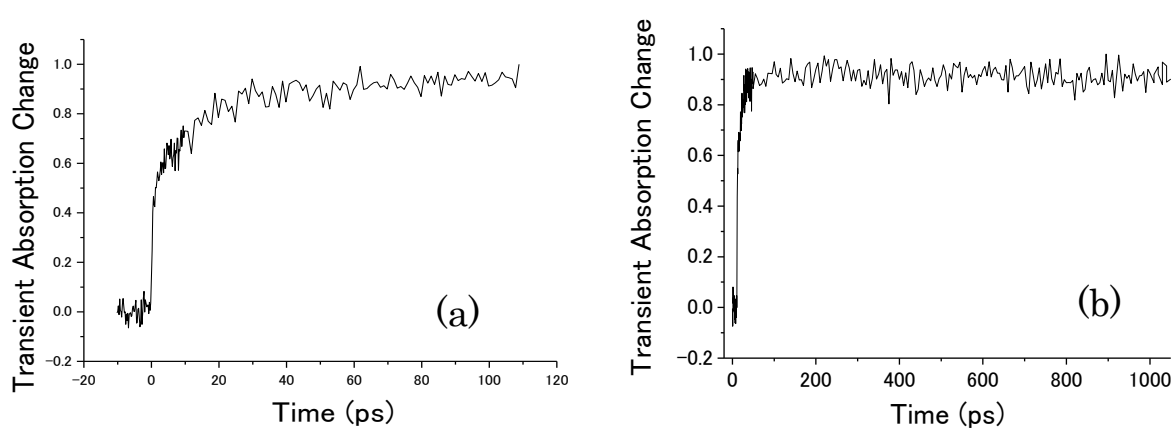

Figure S4. Transient absorption (TA) signal of P3HT/PCBM blend for two time scales of 120 (a) and 1000 ps (b), respectively. The excitation wavelength is 520 nm and the probe wavelength is 775 nm.

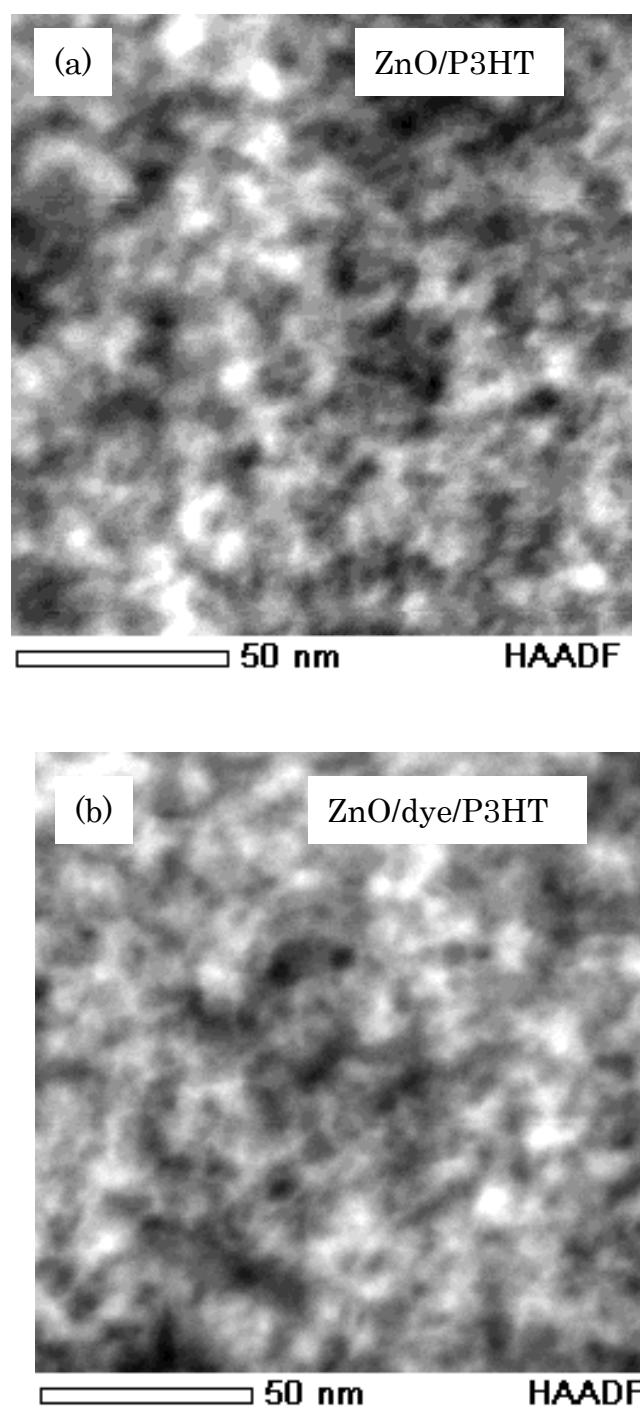

Figure S5. TEM images of P3HT/ZnO (a) and P3HT/dye/ZnO (b). The black domains are ZnO and the white domains are P3Ht.
